# Supplementary material
Source: publisher figshare collection journal article supplement (https://frontiersin.figshare.com/ndownloader/files/12943346)

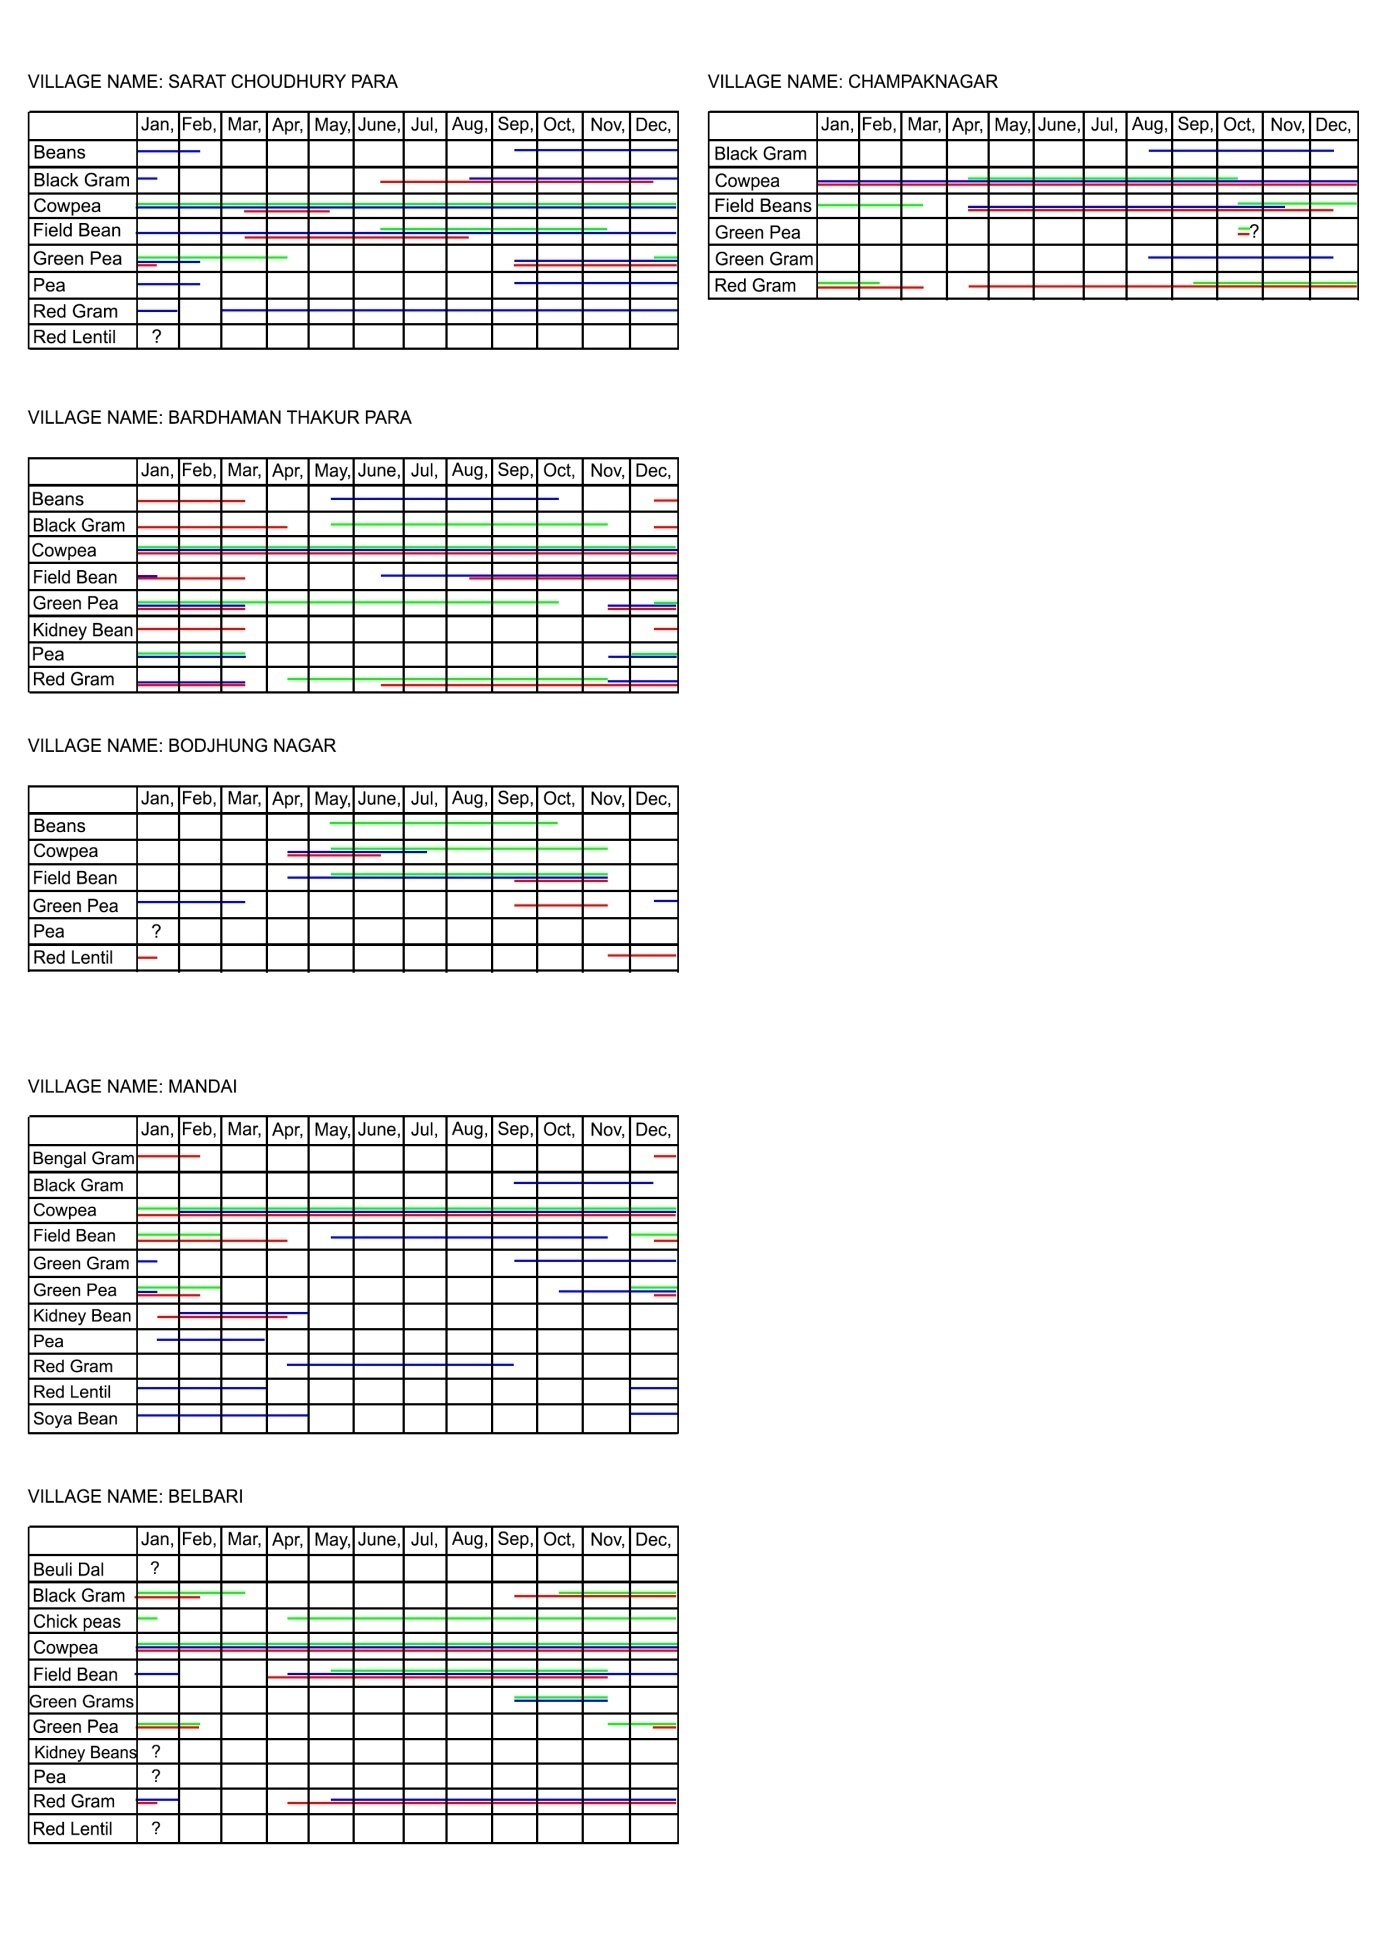

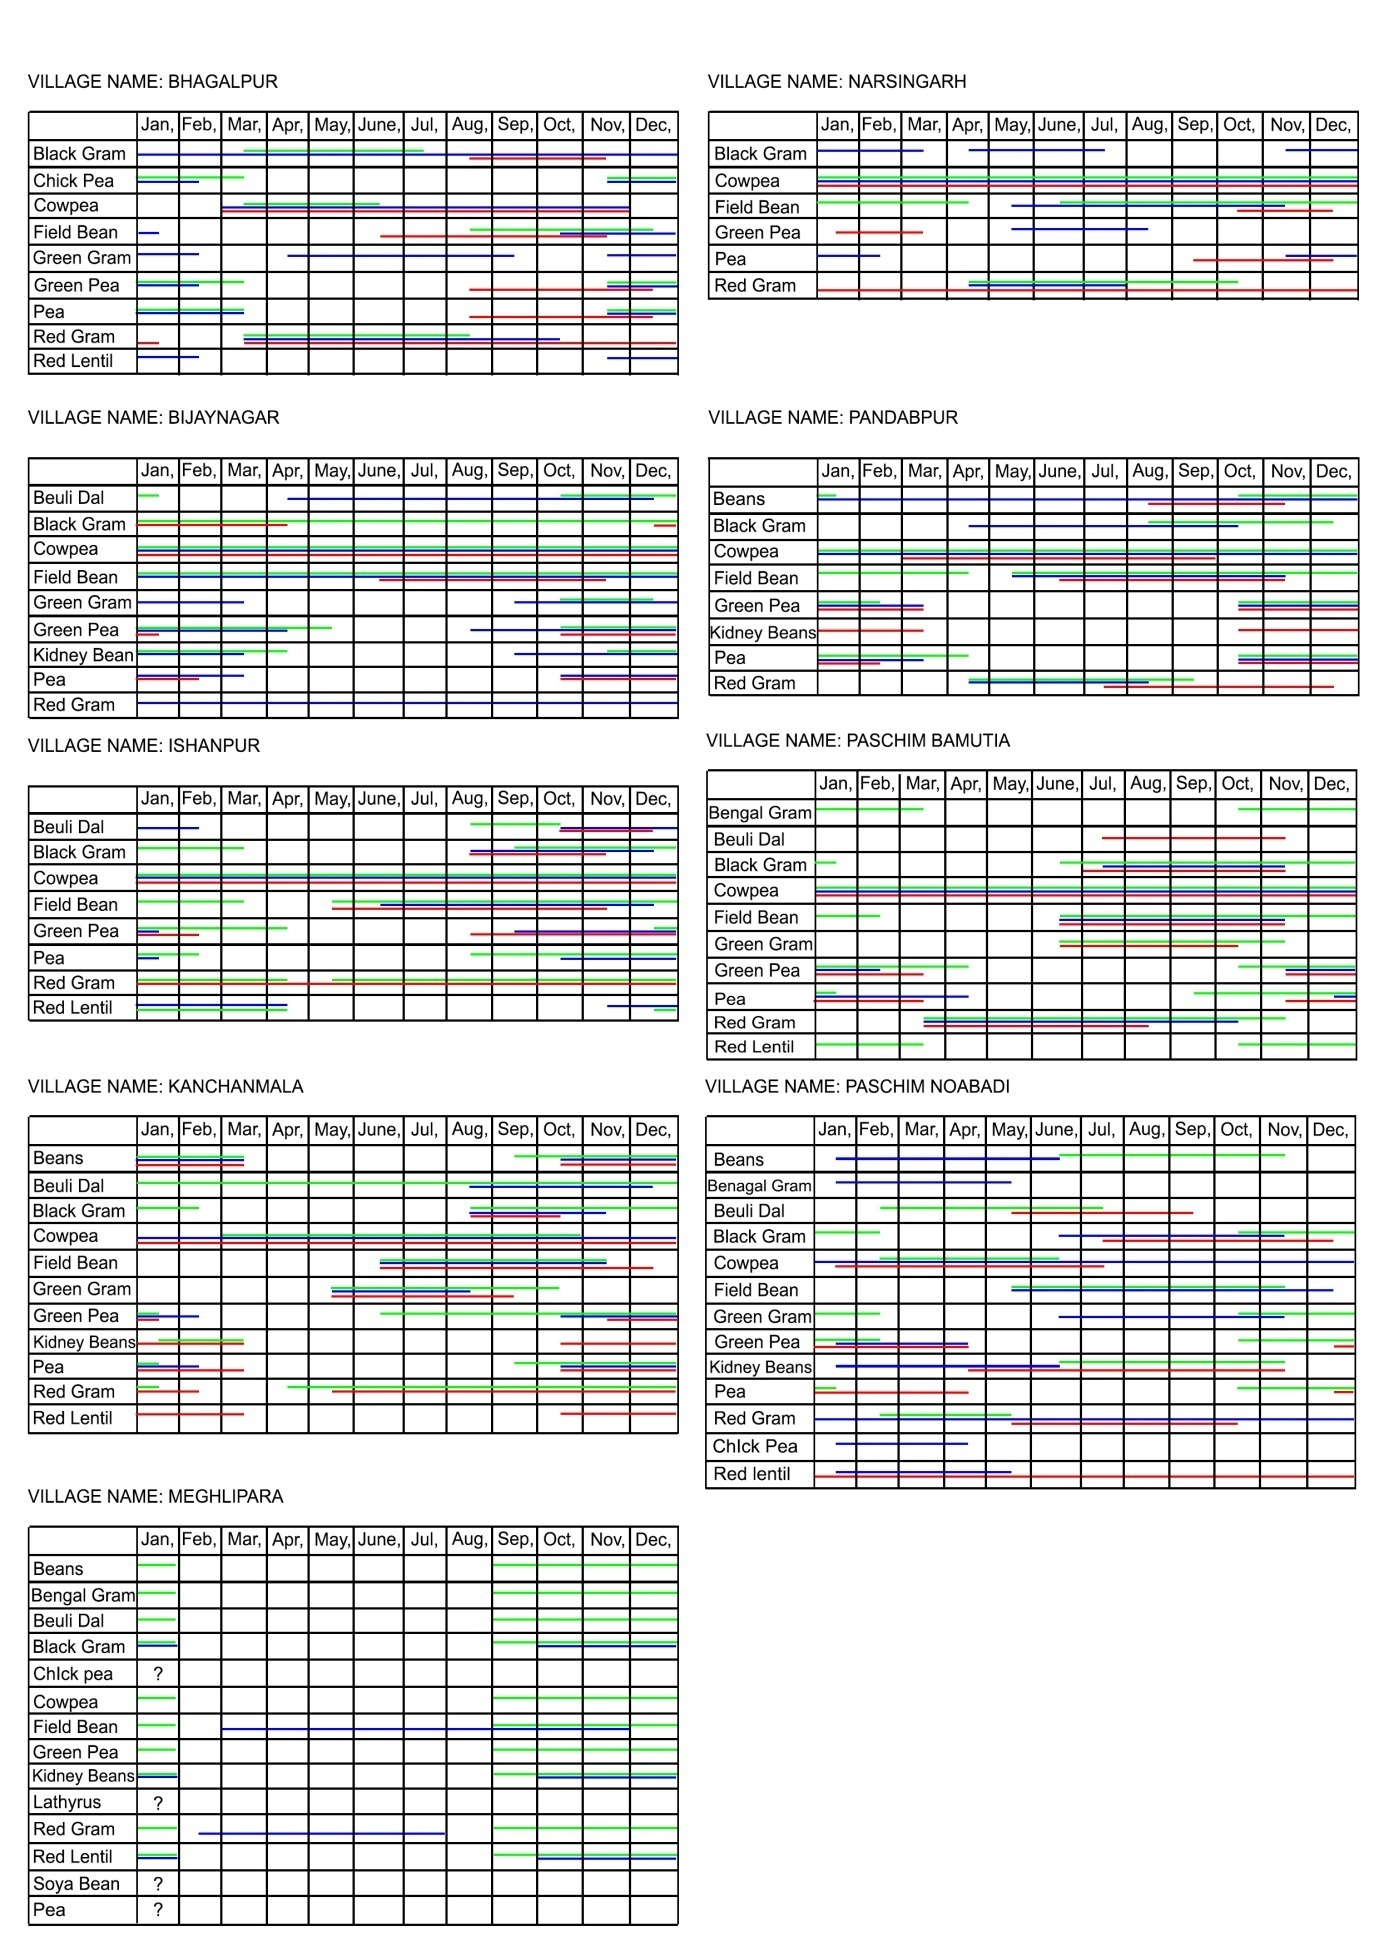


Table S1. Cropping calendars for selected villages in Tripura, NE India

Supplement: Supplementary file 1 [file 12943346]
